# Supplementary material for: Rheumatoid arthritis and idiopathic pulmonary fibrosis: a bidirectional Mendelian randomisation study
Source: PubMed Central journal article supplement (PMC11137470; doi:10.1136/thorax-2023-220856), 2024-04-22

## **Rheumatoid arthritis and idiopathic pulmonary fibrosis: a bidirectional Mendelian randomisation study**

### **Author names**

Olivia C Leavy<sup>1,2</sup>, Leticia Kawano-Dourado<sup>3,4</sup>, Iain D Stewart<sup>5</sup>, Jennifer K Quint<sup>5</sup>, Joshua J Solomon<sup>6</sup>, Raphael Borie<sup>7,8</sup>, Bruno Crestani<sup>7,8</sup>, Louise V Wain<sup>1,2</sup>, R Gisli Jenkins<sup>5</sup>, Philippe Dieudé<sup>8,9</sup>, Cosetta Minelli<sup>5</sup>

### **Affiliations**

<sup>1</sup>Department of Population Health Sciences, University of Leicester, Leicester, United Kingdom, <sup>2</sup>NIHR Leicester Biomedical Research Centre, The Institute for Lung Health, University of Leicester, Leicester, United Kingdom, <sup>3</sup>Hcor Research Institute, Hcor, Sao Paulo, Brazil, <sup>4</sup>Pulmonary Division, Heart Institute (InCor), University of Sao Paulo, Sao Paulo, Brazil, <sup>5</sup>National Heart and Lung Institute, Imperial College London, London, United Kingdom, <sup>6</sup>National Jewish Health, Division of Pulmonary, Critical Care and Sleep Medicine, Denver, Colorado, USA, <sup>7</sup>Service de Pneumologie A Hôpital Bichat, APHP, Paris, France, <sup>8</sup>Université Paris Cité, Inserm, PHERE, F-75018 Paris, France, <sup>9</sup>Service de Rhumatologie A Hôpital Bichat, APHP, Paris, France

### **Corresponding author**

R Gisli Jenkins, National Heart and Lung Institute, Imperial College London, London, United Kingdom, E-mail: gisli.jenkins@imperial.ac.uk

## Supplementary Tables/Figures

Supplementary Table S1: Overview of RA and IPF GWAS study populations

| Phenotype                                                               | Cases  | Controls  | Population                                                                                                                                                                                                                                                                                | PMID ID        | Year |
|-------------------------------------------------------------------------|--------|-----------|-------------------------------------------------------------------------------------------------------------------------------------------------------------------------------------------------------------------------------------------------------------------------------------------|----------------|------|
| RA overall                                                              | 31,313 | 995,377   | Northwestern European:<br>Sweden (8,658 cases & 9,418 controls)<br>Denmark (7,662 cases & 86,964 controls)<br>Iceland (3,613 cases & 341,788 controls)<br>Norway (881 cases & 28,517 controls)<br>UK Biobank (5,798 cases & 402,767 controls)<br>FinnGen (4,701 cases & 125,923 controls) | PMID: 35470158 | 2022 |
| Seropositive RA                                                         | 18,019 | 991,604   |                                                                                                                                                                                                                                                                                           |                |      |
| Seronegative RA                                                         | 8,515  | 1,015,471 |                                                                                                                                                                                                                                                                                           |                |      |
| IPF                                                                     | 4,125  | 20,464    | European:<br>UK Study (612 cases & 3,366 controls)<br>Chicago Study (541 cases & 542 controls)<br>Colorado Study (1,515 cases & 4,683 controls)<br>UUS Study (793 cases & 9,999 controls)<br>Genentech (664 cases & 1,874 controls)                                                       | PMID: 35688625 | 2022 |
| Note: RA = rheumatoid arthritis and IPF = Idiopathic pulmonary fibrosis |        |           |                                                                                                                                                                                                                                                                                           |                |      |

Supplementary Table S2: Seropositive RA and IPF association results, F-statistics and MR causal effects for seropositive RA instrumental variables

[Excel spreadsheet: Supplementary Tables]

Supplementary Table S3: Seronegative RA and IPF association results, F-statistics and MR causal effects for seronegative RA instrumental variables

[Excel spreadsheet: Supplementary Tables]

Supplementary Table S4: IPF and seropositive RA association results, F-statistics and MR causal effects for IPF instrumental variables

[Excel spreadsheet: Supplementary Tables]

Supplementary Table S5: IPF and seronegative RA association results, F-statistics and MR causal effects for IPF instrumental variables

[Excel spreadsheet: Supplementary Tables]

Supplementary Table S6: Results of Mendelian Randomisation analyses to estimate the causal effect of a) seropositive RA (exposure) on IPF (outcome) and the causal effect of seronegative RA (exposure) on IPF (outcome), b) the causal effect of IPF (exposure) on seropositive RA (outcome) and the causal effect of IPF (exposure) on seronegative RA (outcome).

a) the causal effect of seropositive RA (exposure) on IPF (outcome) and the causal effect of seronegative RA (exposure) on IPF (outcome)

| Exposure/Outcome    | No. IVs   | Model             | OR [95% CI]       | P                        | Heterogeneity test                                                      |
|---------------------|-----------|-------------------|-------------------|--------------------------|-------------------------------------------------------------------------|
| Seropositive RA/IPF | 70        | IVW-FE            | 0.93 [0.87, 0.99] | 0.032                    | $I^2 = 41.3%$ [95% CI: 22%, 56%],<br>Cochran's Q $P = 2 \times 10^{-4}$ |
|                     |           | IVW-RE            | 0.93 [0.85, 1.01] | 0.101                    |                                                                         |
|                     |           | Weighted median   | 0.88 [0.80, 0.97] | 0.010                    |                                                                         |
|                     |           | Weighted mode     | 0.88 [0.80, 0.96] | 0.005                    |                                                                         |
|                     |           | MR-Egger          | 0.86 [0.75, 0.97] | 0.017                    | $I^2_{GX} = 97.4%$                                                      |
|                     |           | MR-PRESSO         | 0.93 [0.85, 1.01] | 0.105                    | Global test $P = 2 \times 10^{-4}$                                      |
| Seronegative RA/IPF | 16        | IVW-FE            | 0.95 [0.82, 1.11] | 0.556                    | $I^2 = 57.7%$ [95% CI: 27%, 76%],<br>Cochran's Q $P = 0.002$            |
|                     |           | IVW-RE            | 0.95 [0.75, 1.21] | 0.702                    |                                                                         |
|                     |           | Weighted median   | 0.89 [0.70, 1.12] | 0.314                    |                                                                         |
|                     |           | Weighted mode     | 0.80 [0.64, 1.01] | 0.061                    |                                                                         |
|                     |           | MR-Egger          | 0.72 [0.46, 1.13] | 0.154                    | $I^2_{GX} = 87.6%$                                                      |
|                     |           | MR-Egger (SIMEX)  | 0.70 [0.43, 1.14] | 0.170                    |                                                                         |
|                     | MR-PRESSO | 1.13 [0.85, 1.50] | 0.405             | Global test $P = 0.0087$ |                                                                         |

OR = odds ratio, CI = confidence interval, MR = Mendelian Randomisation, IVW = inverse-variance weighted, FE = Fixed Effect, RE = Random Effect, SIMEX = simulation extrapolation, PRESSO = Pleiotropy RESidual Sum and Outlier

b) the causal effect of IPF (exposure) on seropositive RA (outcome) and the causal effect of IPF (exposure) on seronegative RA (outcome).

| Exposure/Outcome    | No. IVs | Model           | OR [95% CI]       | P                      | Heterogeneity test                                            |
|---------------------|---------|-----------------|-------------------|------------------------|---------------------------------------------------------------|
| IPF/Seropositive RA | 19      | IVW-FE          | 1.06 [1.04, 1.08] | $1.22 \times 10^{-11}$ | $I^2 = 49.4%$ [95% CI: 14%, 70%],<br>Cochran's Q $P = 0.0080$ |
|                     |         | IVW-RE          | 1.06 [1.04, 1.09] | $3.71 \times 10^{-7}$  |                                                               |
|                     |         | Weighted median | 1.06 [1.04, 1.09] | $1.74 \times 10^{-8}$  |                                                               |
|                     |         | Weighted mode   | 1.07 [1.04, 1.09] | $1.02 \times 10^{-8}$  |                                                               |
|                     |         | MR-Egger        | 1.06 [1.02, 1.10] | 0.003                  | $I^2_{GX} = 98.4%$                                            |
|                     |         | MR-PRESSO       | 1.07 [1.05, 1.09] | $1.27 \times 10^{-7}$  | Global test $P = 0.0313$                                      |
| IPF/Seronegative RA | 19      | IVW-FE          | 1.02 [0.99, 1.04] | 0.182                  | $I^2 = 0%$ [95% CI: 0%, 49%],<br>Cochran's Q $P = 0.7615$     |
|                     |         | IVW-RE          | 1.02 [0.99, 1.04] | 0.182                  |                                                               |
|                     |         | Weighted median | 1.02 [0.99, 1.04] | 0.296                  |                                                               |
|                     |         | Weighted mode   | 1.01 [0.98, 1.04] | 0.408                  |                                                               |
|                     |         | MR-Egger        | 1.02 [0.98, 1.06] | 0.296                  | $I^2_{GX} = 98.4%$                                            |
|                     |         | MR-PRESSO       | 1.02 [1.00, 1.03] | 0.140                  | Global test $P = 0.8128$                                      |

OR = odds ratio, CI = confidence interval, MR = Mendelian Randomisation, IVW = inverse-variance weighted, FE = Fixed Effect, RE = Random Effect, PRESSO = Pleiotropy RESidual Sum and Outlier

Supplementary Figure S1: Consort diagram to show comparison of Mendelian randomisation with randomised control trial

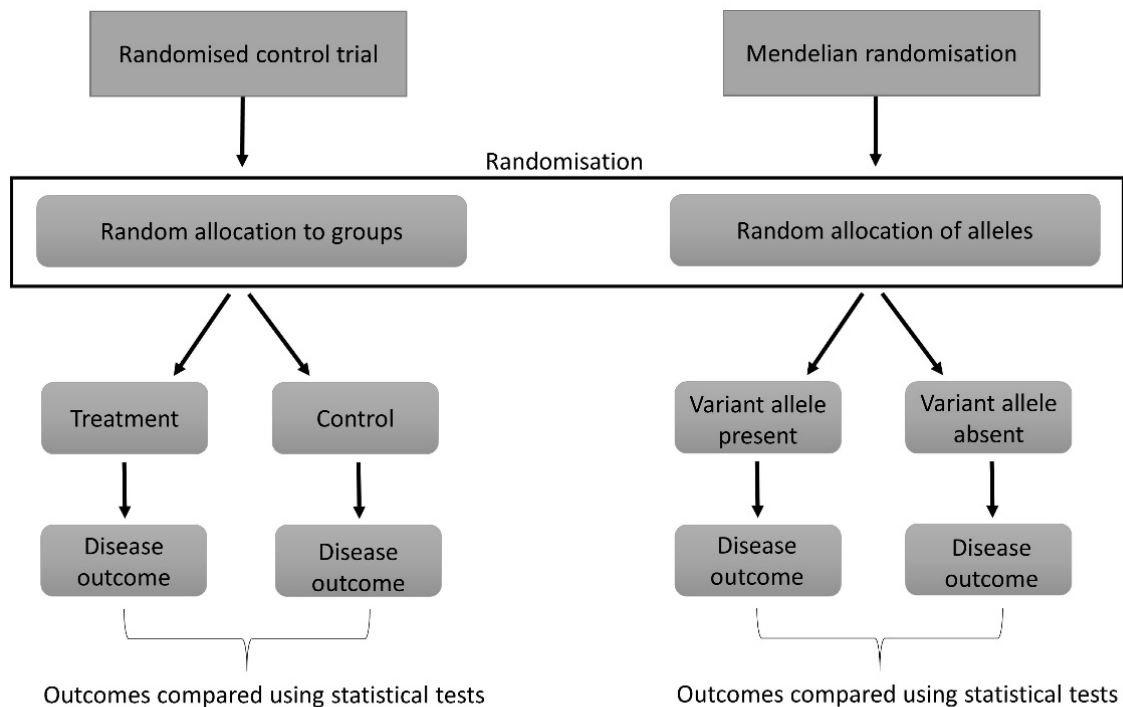

Supplementary Figure S2: Overview of exposure IV selection

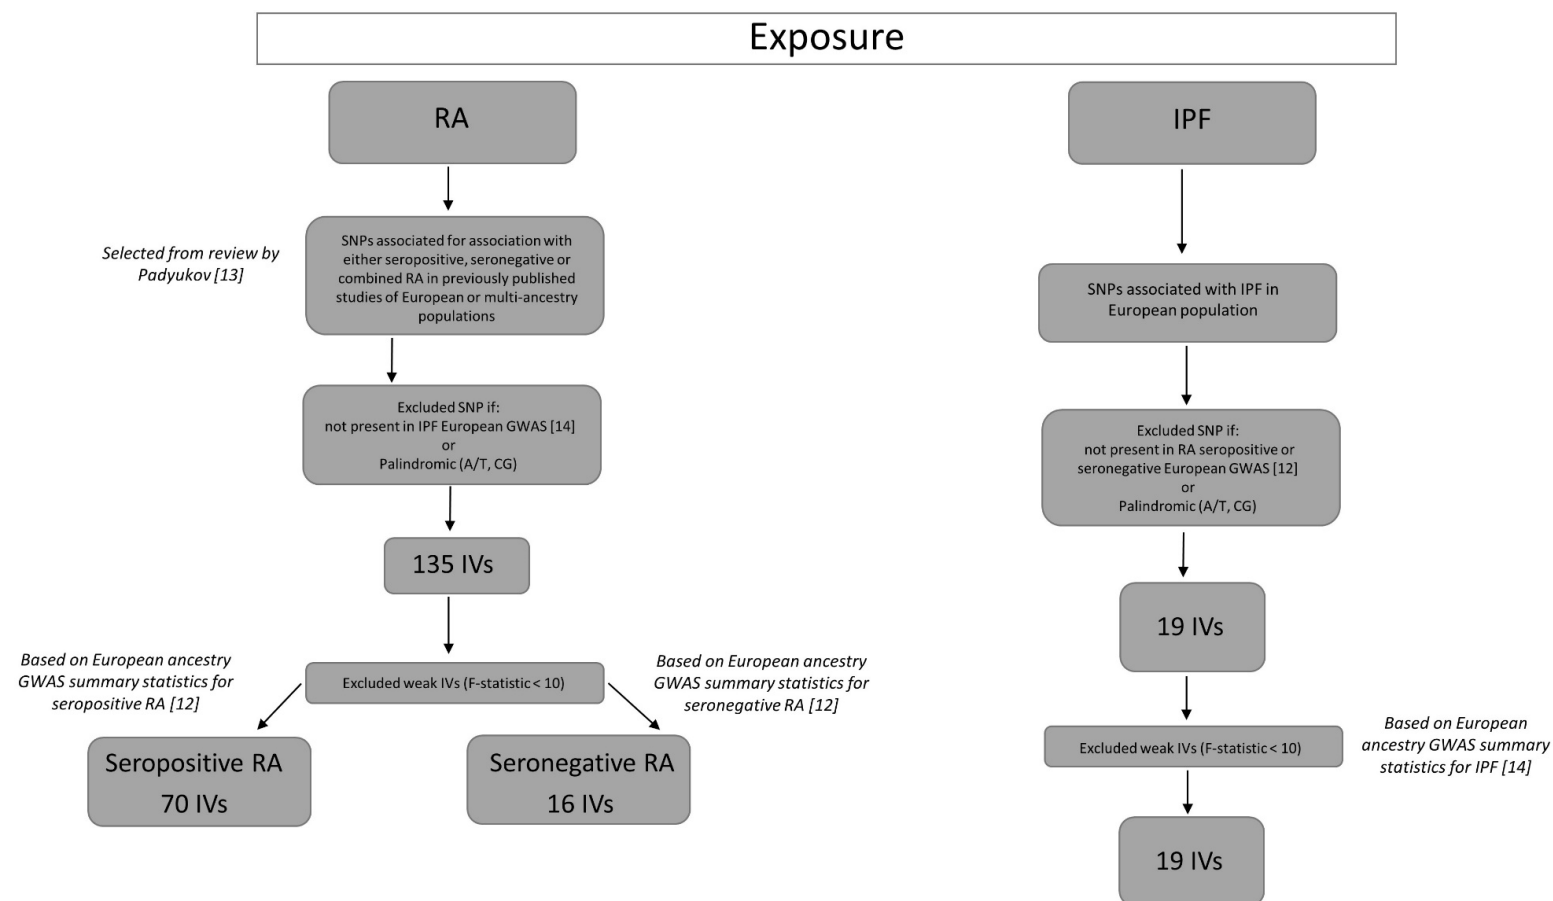

Note: RA = rheumatoid arthritis, IPF = idiopathic pulmonary fibrosis, SNP = single nucleotide polymorphism, GWAS = genome-wide association study and IVs = instrumental variables

Supplementary Figure S3: Plot of Cochran Q contribution for each seropositive RA instrumental variable

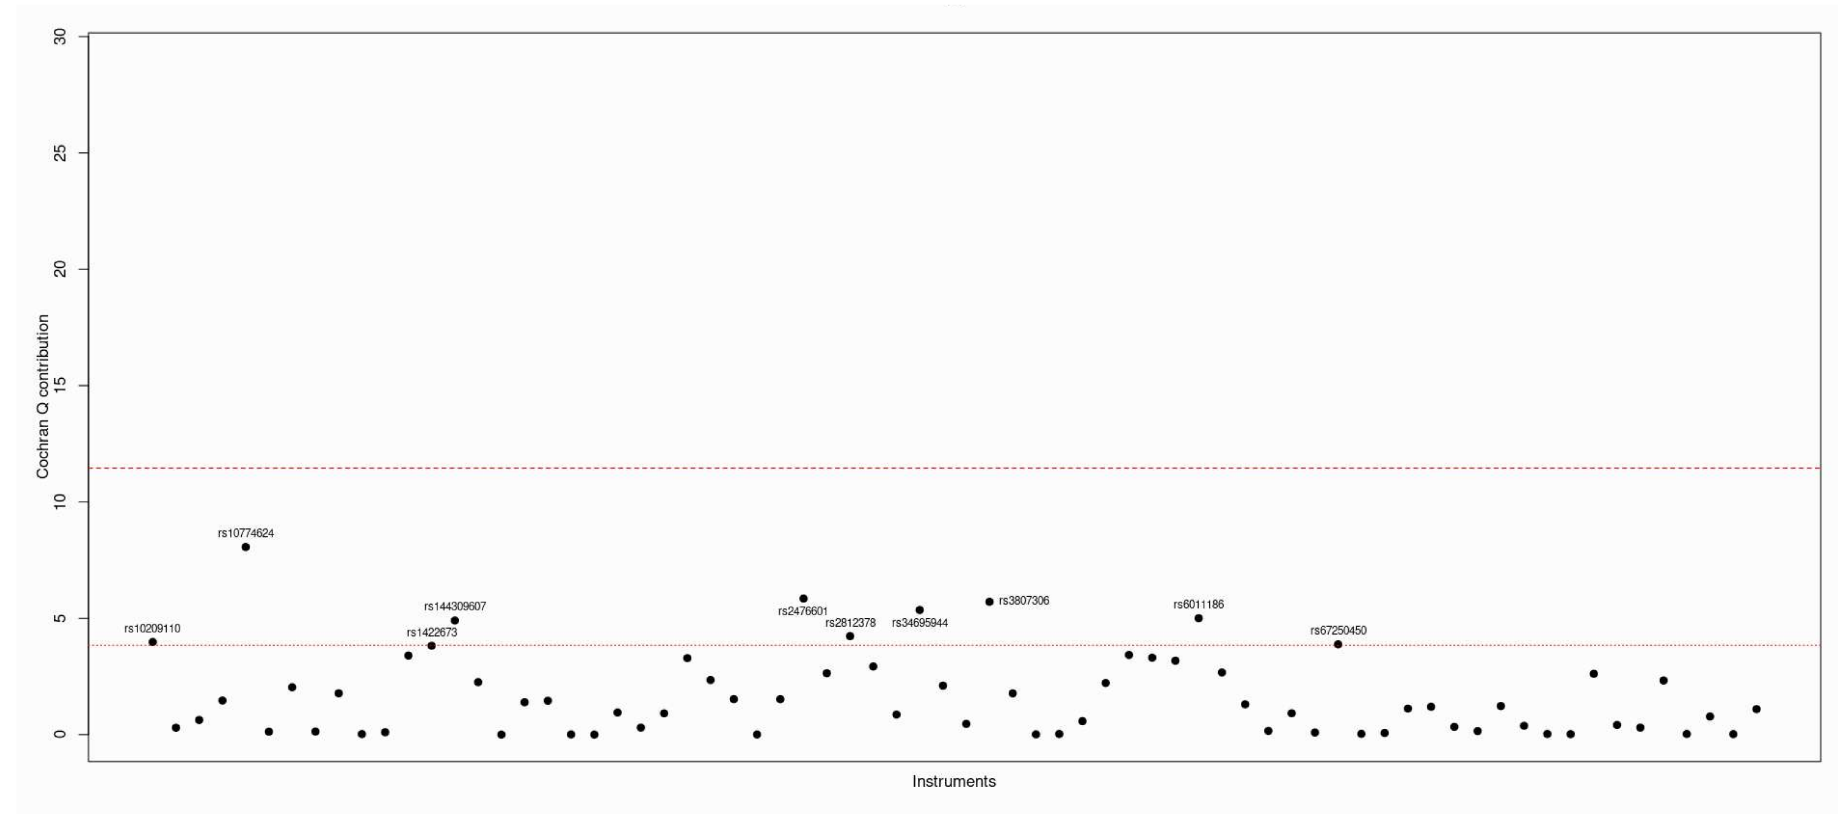

Supplementary Figure S4: Leave one out analysis for estimation of causal effect of seropositive RA on IPF

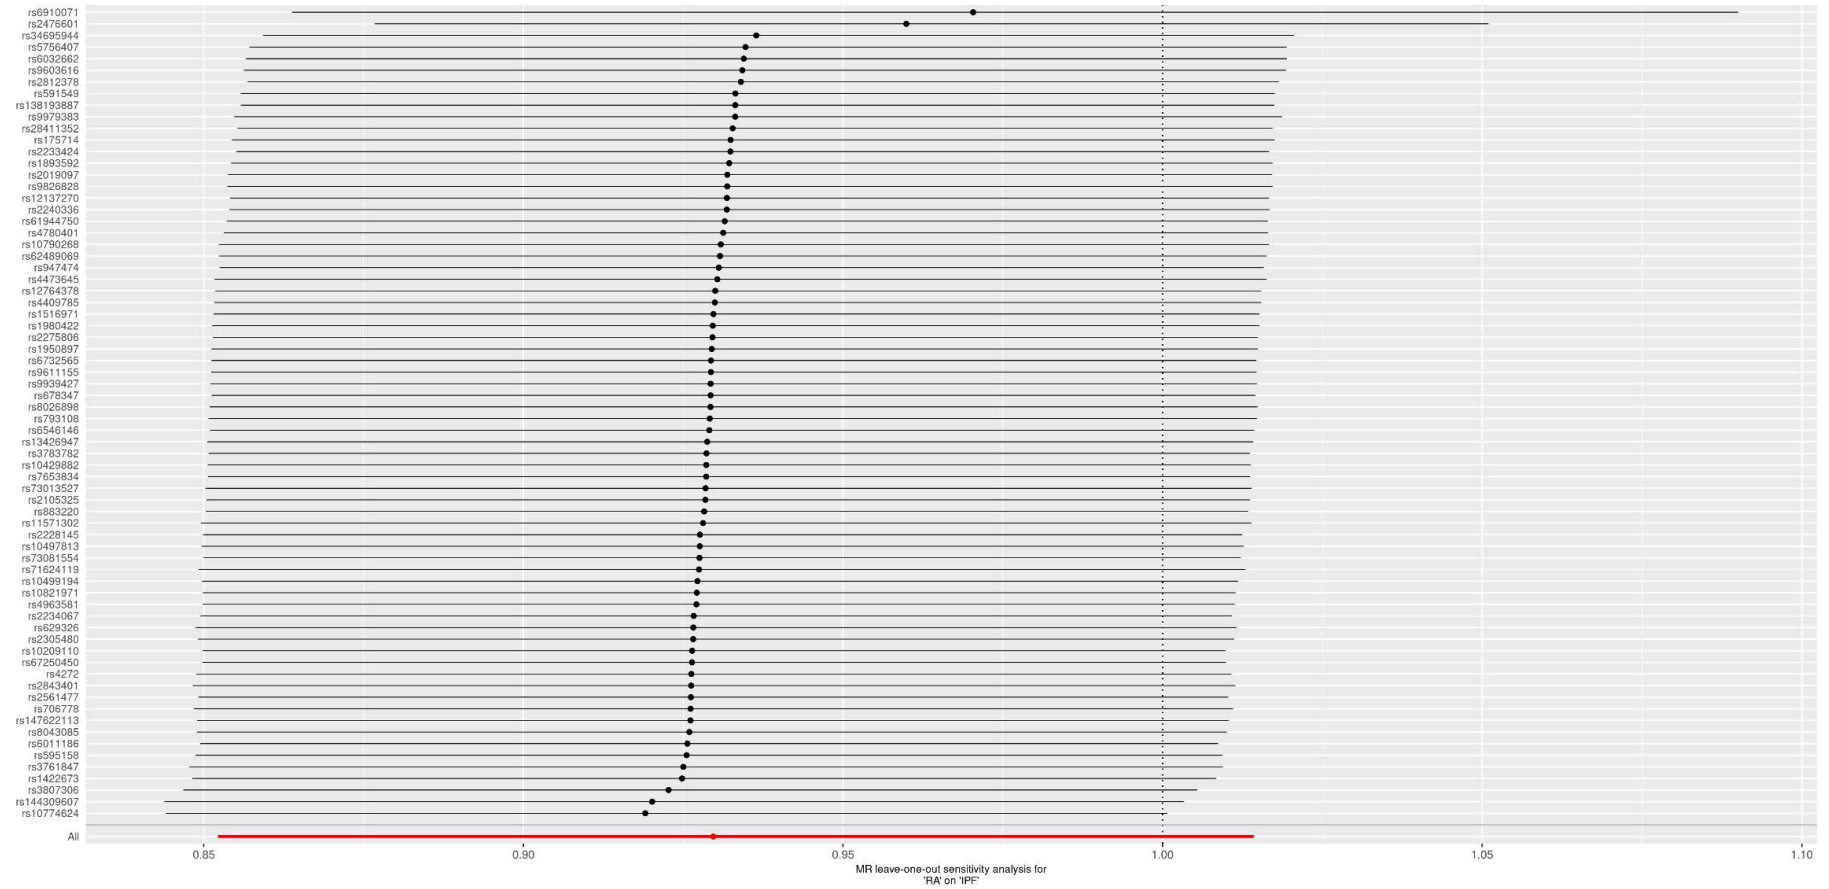

Supplementary Figure S5: Leave one out analysis for estimation of causal effect of seronegative RA on IPF

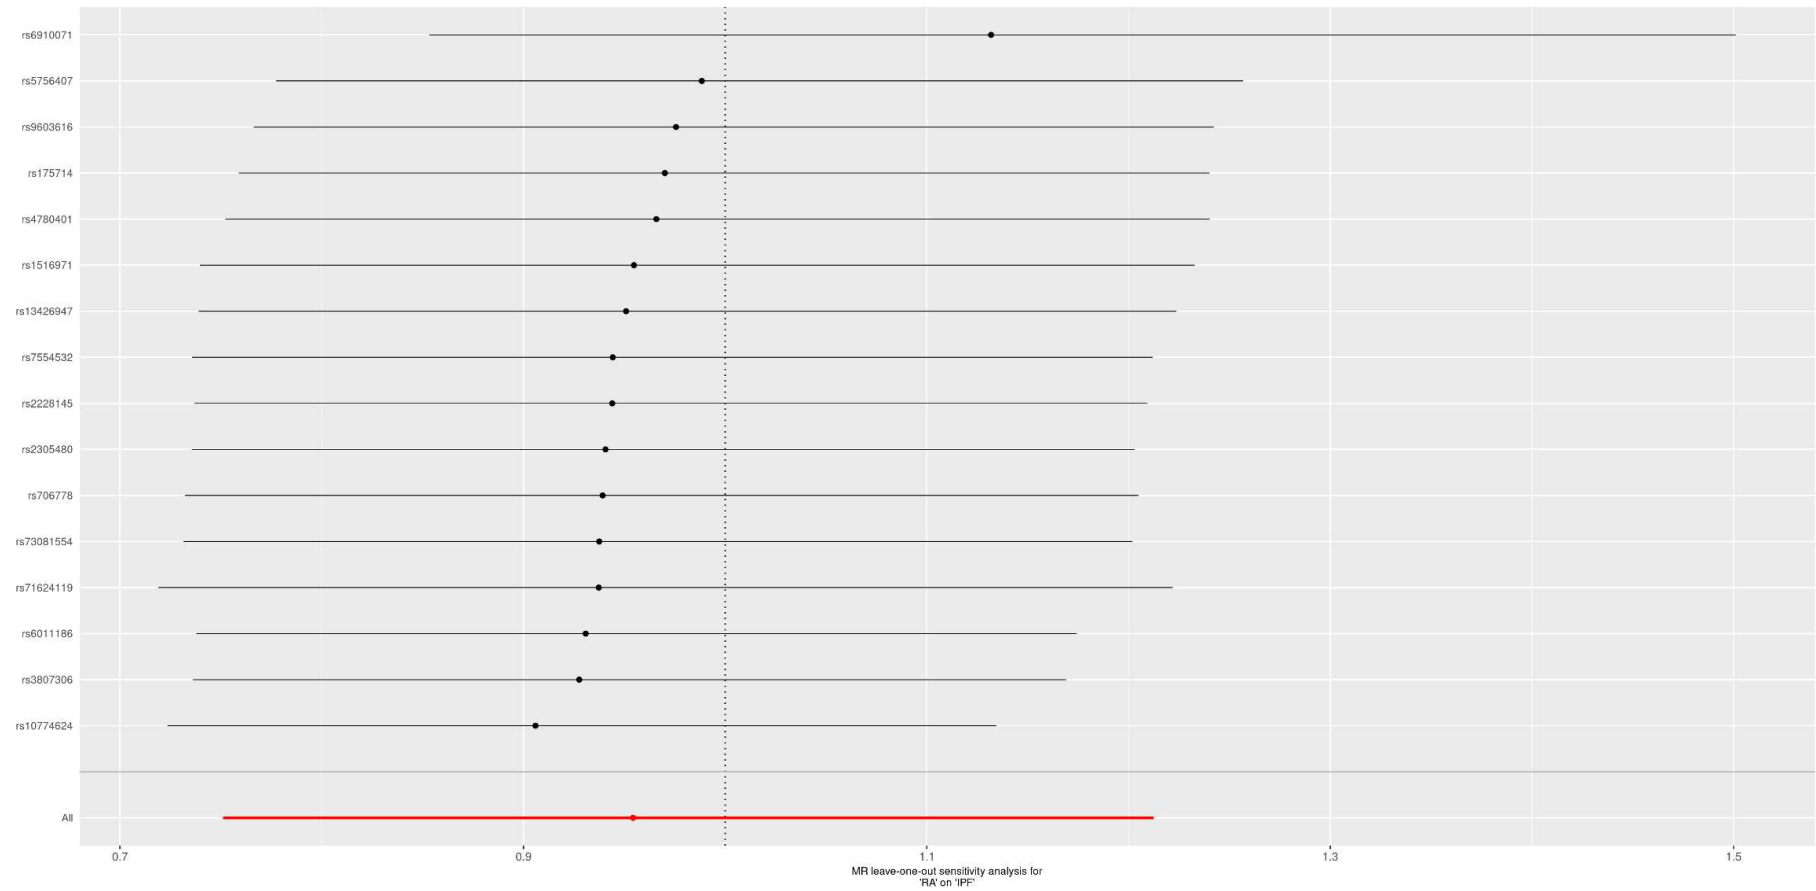



Supplementary Figure S6: Leave one out analysis for estimation of causal effect of IPF on seropositive RA

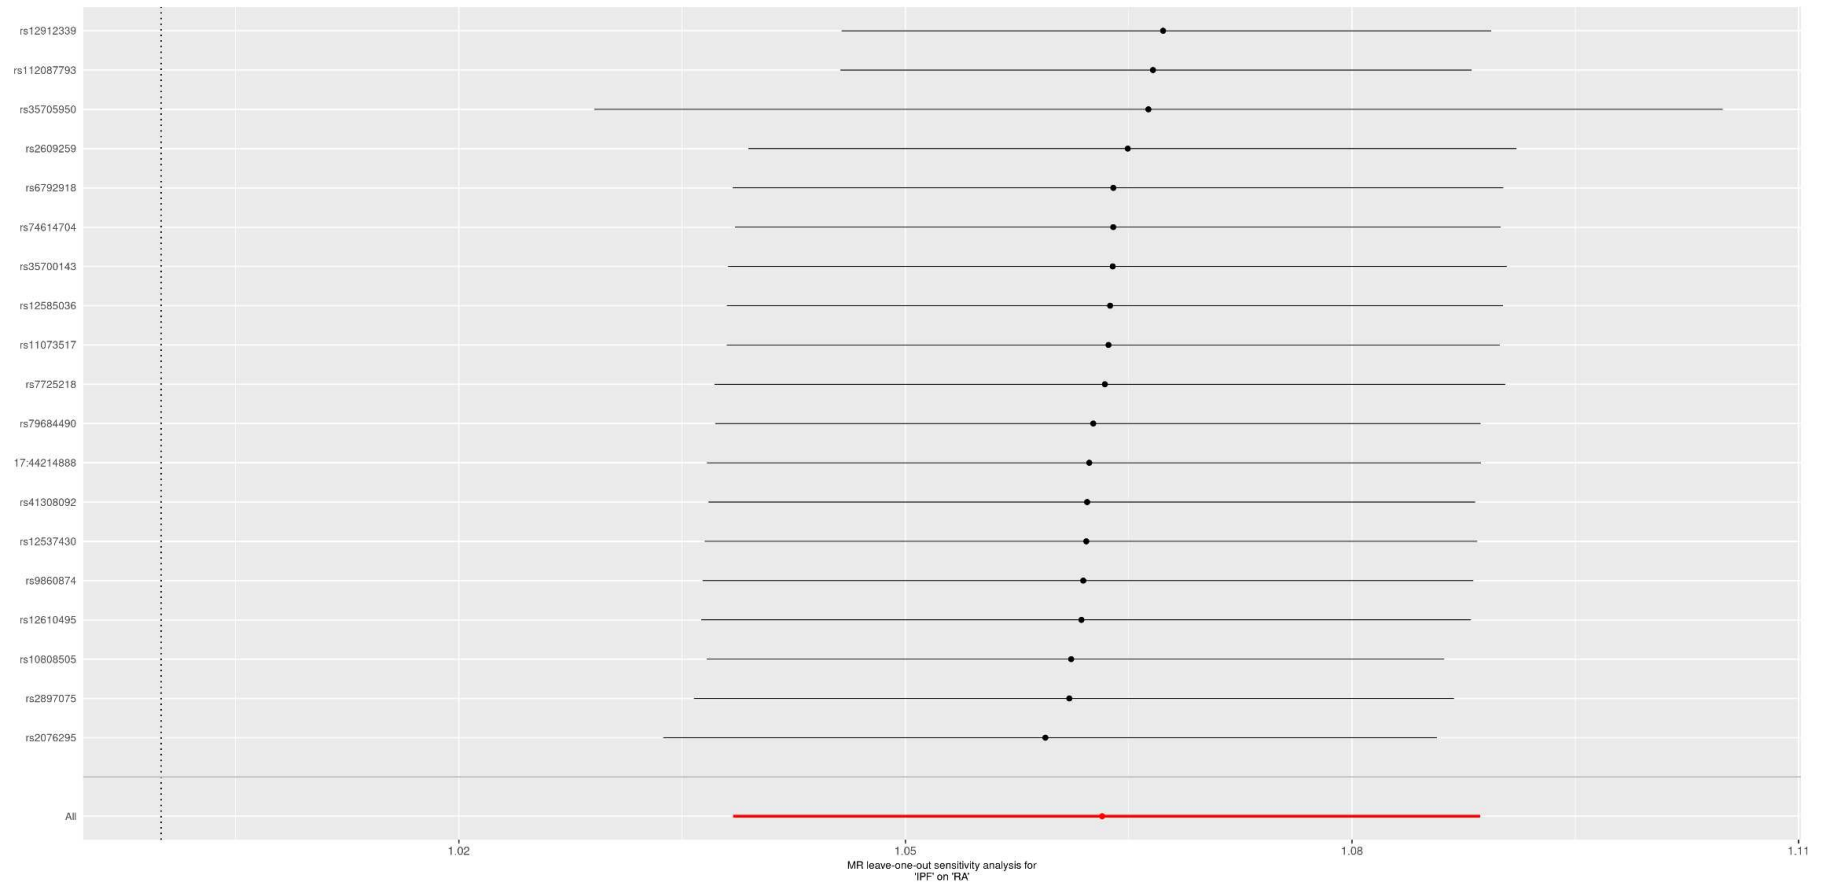

Supplementary Figure S7: Leave one out analysis for estimation of causal effect of IPF on seronegative RA

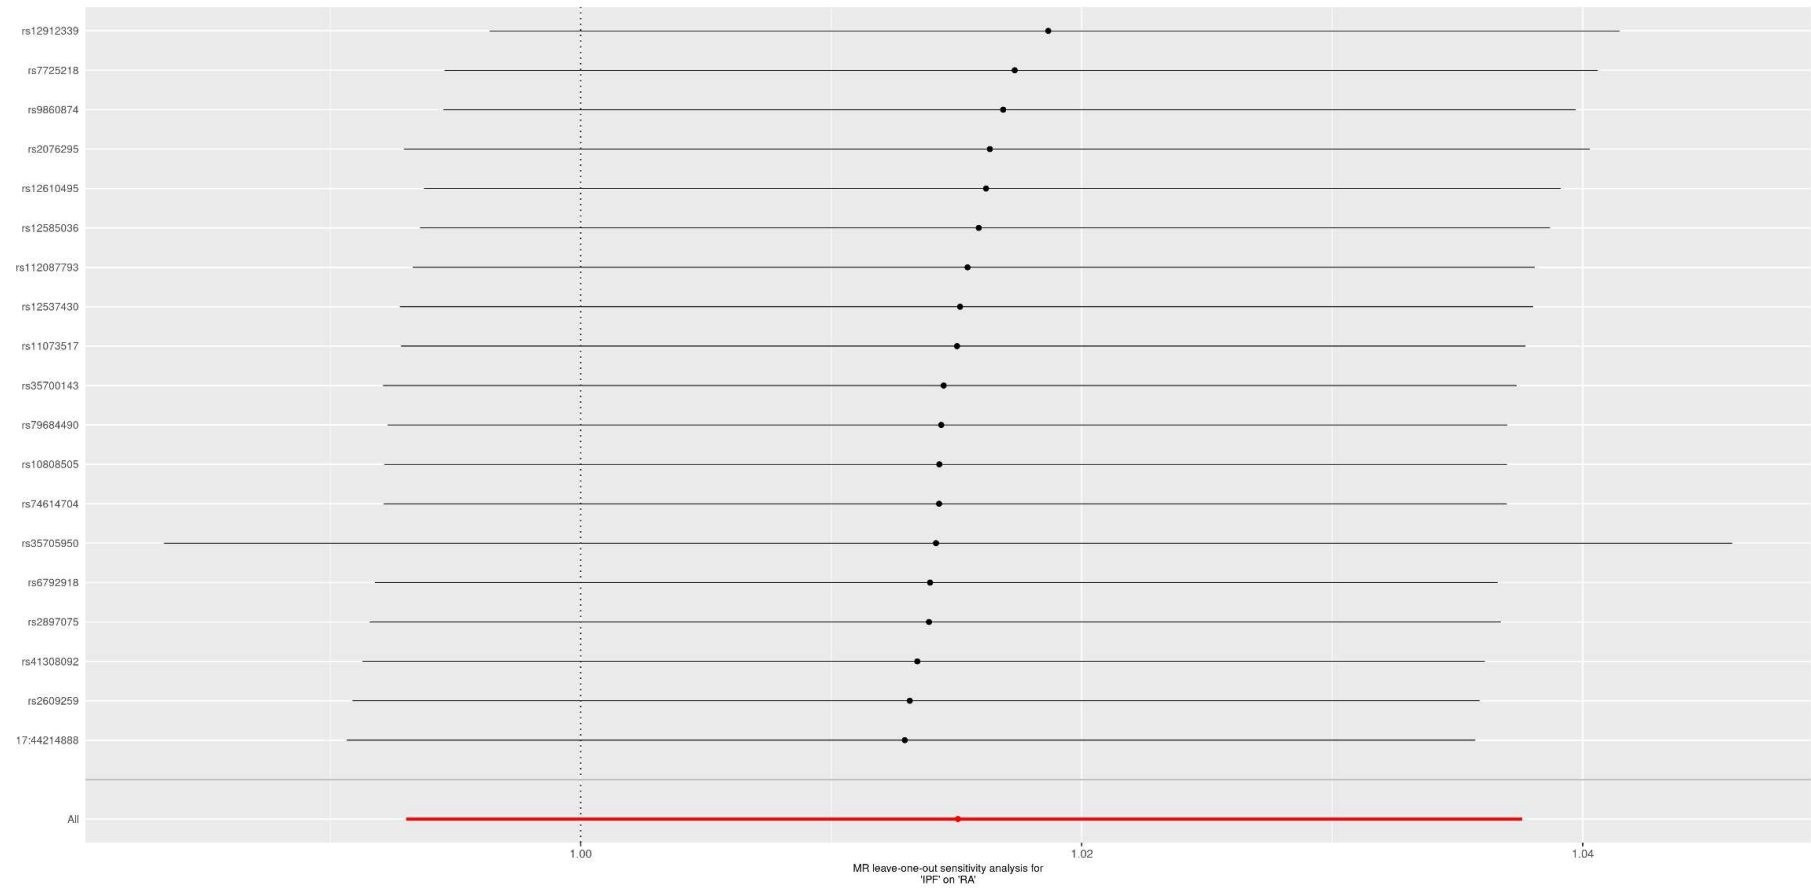

Supplement: thorax-2023-220856supp001.pdf [file thorax-2023-220856supp001.pdf]
