# Supplementary material for: Rheumatoid arthritis and idiopathic pulmonary fibrosis: a bidirectional Mendelian randomisation study
Source: PubMed Central journal article supplement (PMC11137470; doi:10.1136/thorax-2023-220856), 2024-04-22
Supplement: thorax-2023-220856supp003.pdf [file thorax-2023-220856supp003.pdf]

## Rheumatoid arthritis and idiopathic pulmonary fibrosis: a bidirectional Mendelian randomisation study

Leavy OC, et al. *Thorax* 2024. DOI: 10.1136/thorax-2024-220856

In some patients, is RA-ILD simply a co-occurrence of IPF and RA? Or is there a causal relationship?

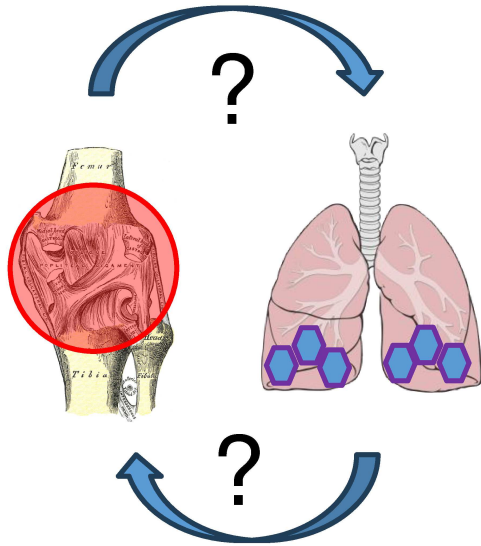

For a Mendelian Randomisation analysis, variants associated with RA (red) and IPF (purple) were used as instrumental variables (IVs).

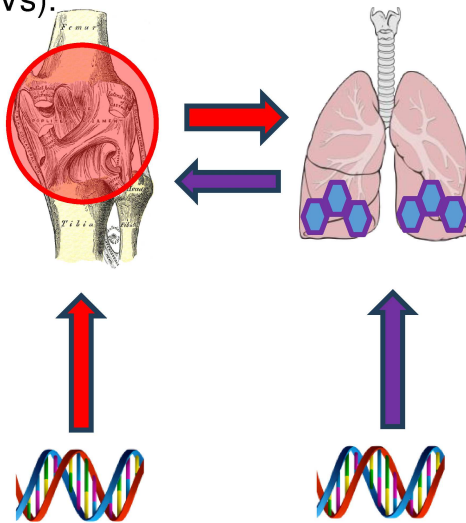

IVs for IPF were associated with increased risk of RA but not vice versa. *The causal relationship is thus likely from IPF to RA.*

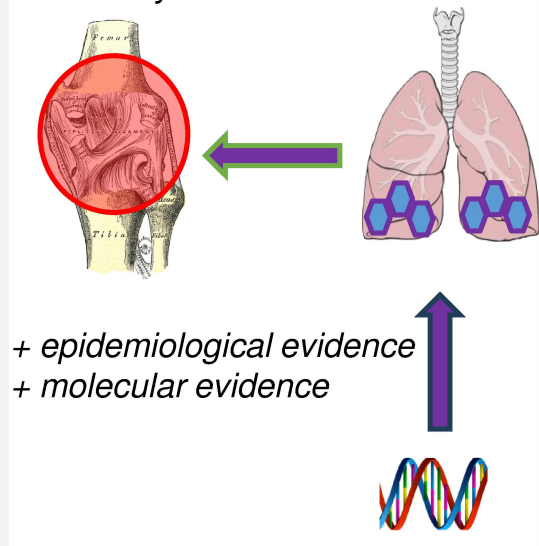

# Thorax

thorax.bmj.com

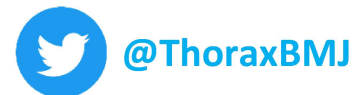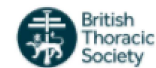

# BMJ
